# Supplementary material for: A Crucial Role of Proteolysis in the Formation of Intracellular Dinitrosyl Iron Complexes
Source: MDPI journal article supplement (doi:10.3390/molecules29071630), 2024-04-05
Supplement: s1 [file s1]

## Supplementary figures

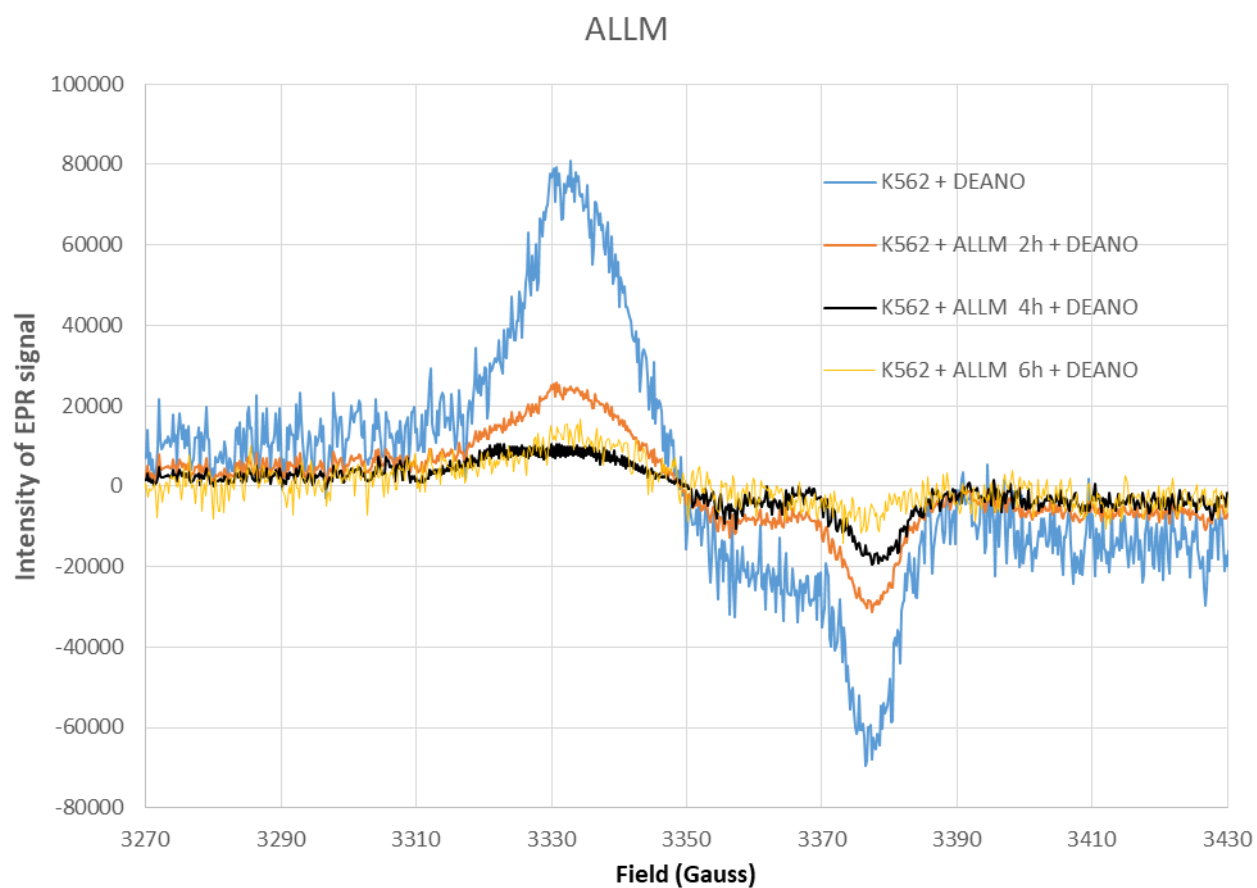

**Supplementary Figure 1.** Representative EPR spectra of K562 cells incubated with 50  $\mu\text{M}$  ALLM for indicated time (0, 2, 4, 6 h) and then treated with 70  $\mu\text{M}$  DEANO for 15 min at 37°C

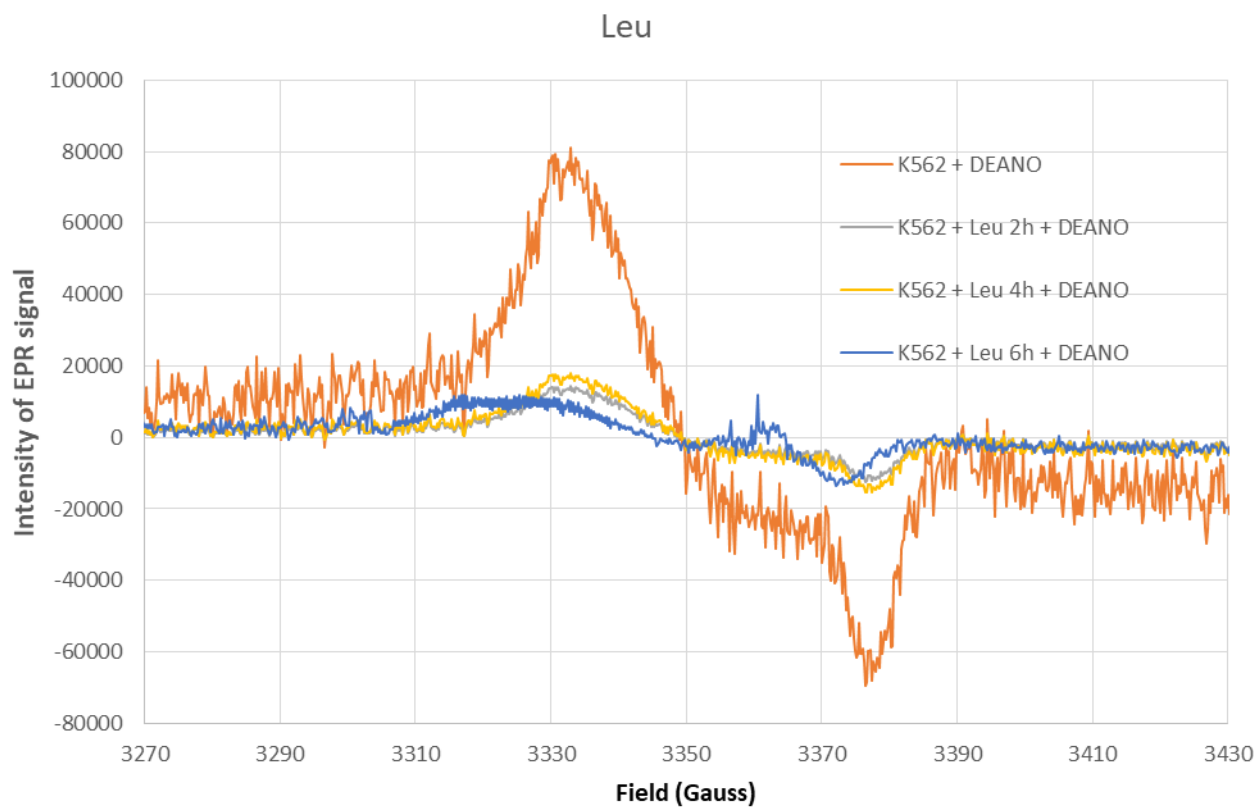

**Supplementary Figure 2.** Representative EPR spectra of K562 cells incubated with 100  $\mu$ M leupeptin for indicated time (0, 2, 4, 6 h) and then treated with 70  $\mu$ M DEANO for 15 min at 37°C

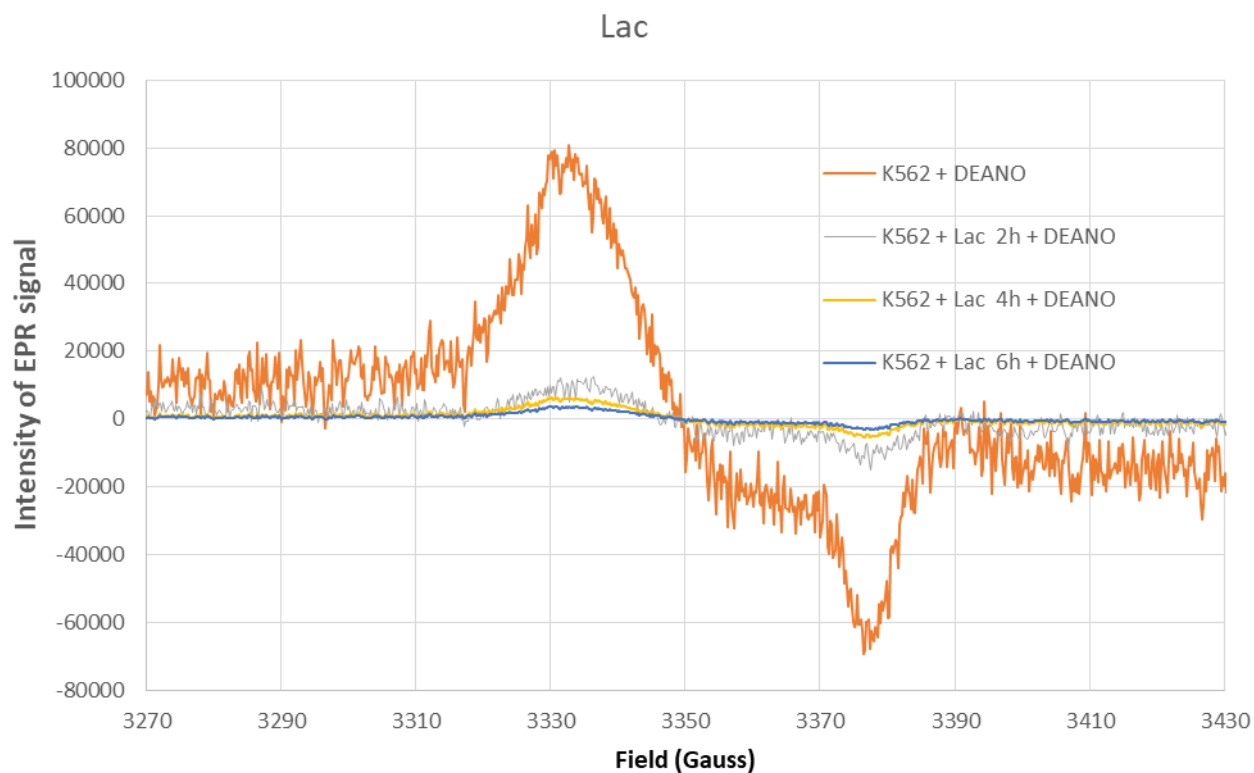

**Supplementary Figure 3.** Representative EPR spectra of K562 cells incubated with 20 $\mu$ M lactacystin for indicated time (0, 2, 4, 6 h) and then treated with 70  $\mu$ M DEANO for 15 min at 37°C

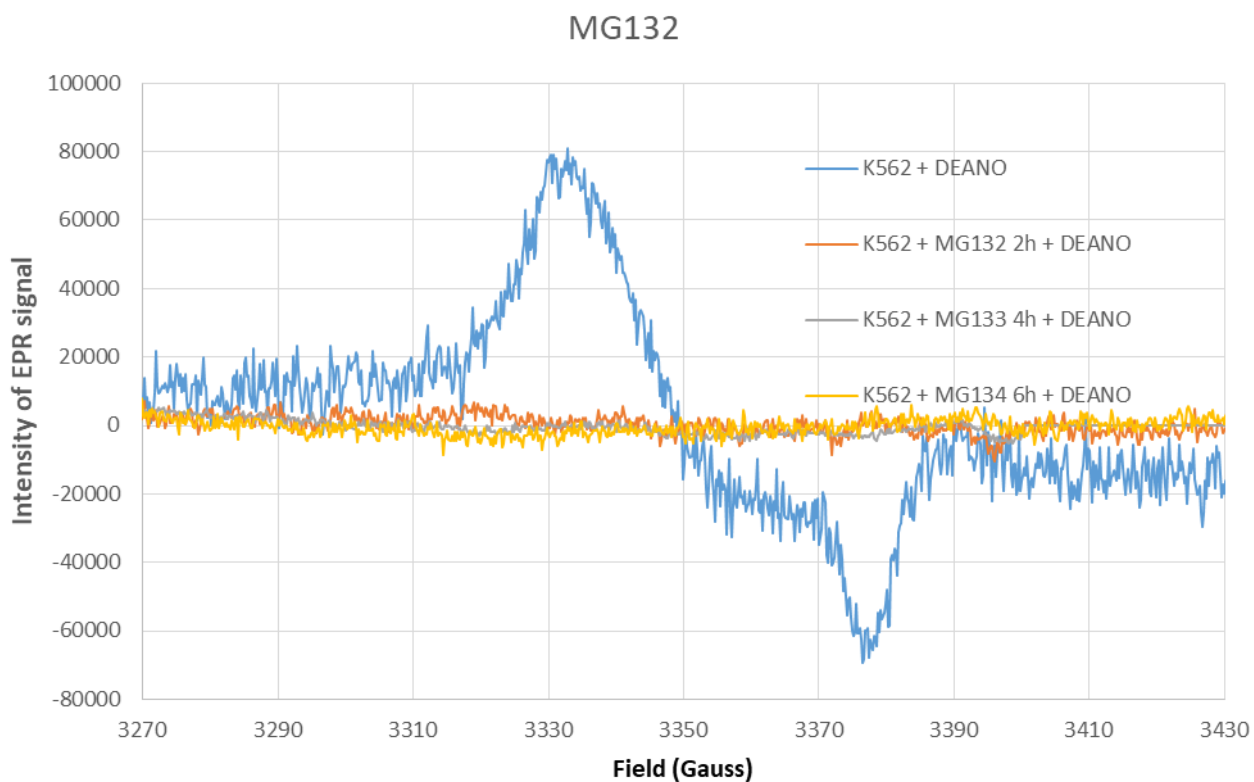

**Supplementary Figure 4.** Representative EPR spectra of K562 cells incubated with 25  $\mu$ M MG132 for indicated time (0, 2, 4, 6 h) and then treated with 70  $\mu$ M DEANO for 15 min at 37°C

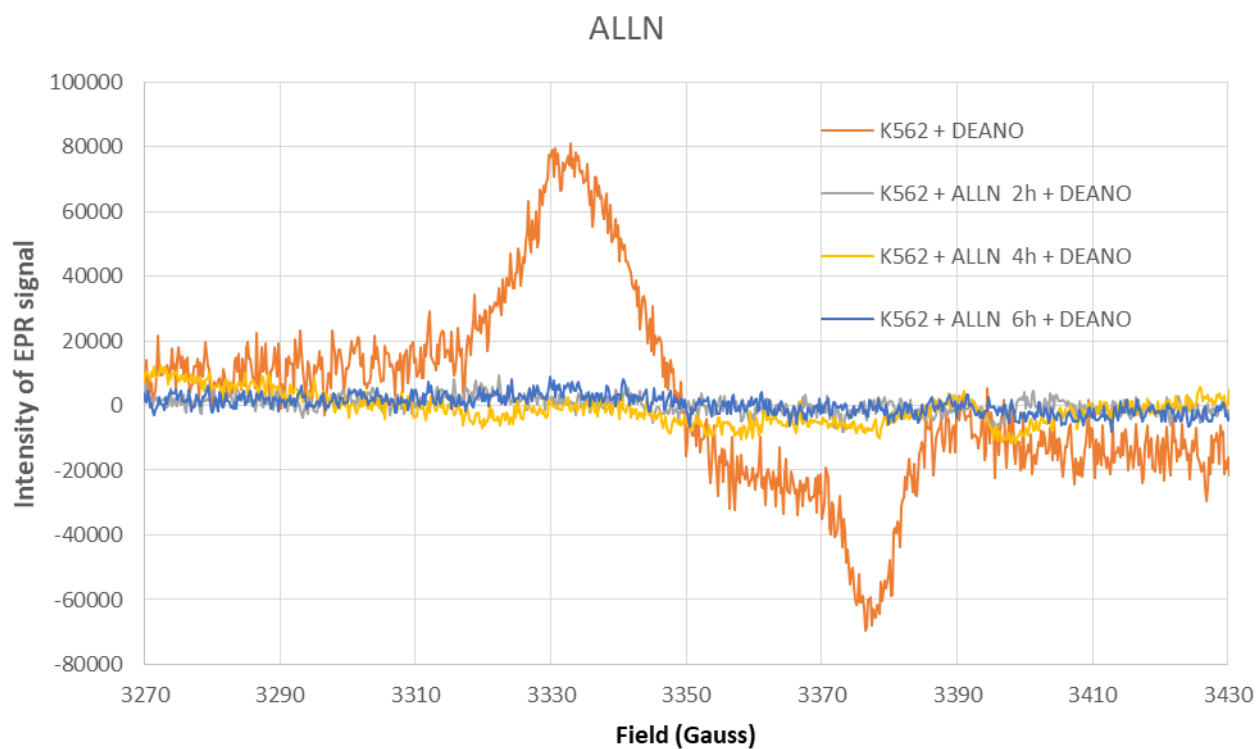

**Supplementary Figure 5.** Representative EPR spectra of K562 cells incubated with 20 $\mu$ M ALLN for indicated time (0, 2, 4, 6 h) and then treated with 70  $\mu$ M DEANO for 15 min at 37°C
